# Supplementary material
Source: PubMed Central journal article supplement (PMC4547831)
Supplement: NIHMS691488-supplement-Supplemental_table.pdf [file NIHMS691488-supplement-Supplemental_table.pdf]

### Supplementary table 1

| Gene name | Expression in <i>Barx2</i> <sup>-/-</sup> /wildtype myoblasts<br>P<0.01s |
|-----------|--------------------------------------------------------------------------|
| Cdh       | 0.0455                                                                   |
| Vcan      | 0.1635                                                                   |
| Ctgf      | 0.198                                                                    |
| Ecm1      | 0.2496                                                                   |
| Itga4     | 0.1662                                                                   |
| Itga5     | 0.0967                                                                   |
| Lama2     | 0.0579                                                                   |
| Lamb2     | 0.0671                                                                   |
| MMP3      | 0.4736                                                                   |
| MMP7      | 0.2575                                                                   |
| Sgce      | 0.0635                                                                   |
| Sparc     | 0.1078                                                                   |
| Spock1    | 0.3858                                                                   |
| TnC       | 0.228                                                                    |
| Vcam      | 0.2413                                                                   |

### Supplementary Table 1. Gene expression analysis using the 'ECM & Adhesion PCR Array' reveals down-regulated genes in *Barx2*<sup>-/-</sup> myoblasts.

Total RNA samples from wildtype and *Barx2*<sup>-/-</sup> primary myoblast cultures (prepared from P5 littermates) were assayed in triplicates, and the relative expression levels for each gene in the two samples were plotted against each other in a scatter plot. Genes encoding the matrix metalloproteinases (MMP3 & MMP7); integrins (Itga4 and Itga5); extracellular matrix molecules (ECM1, Lama2, Lamb2, TnC); cell contact and adhesion molecules (Vcan, Cad2, Vcam); proteoglycans (Sparc, Spock1, Sgce) and connective tissue growth factor (Ctgf) down-regulated, by more than two-fold in *Barx2*<sup>-/-</sup> myoblasts relative to wildtype myoblasts. Three independent experiments were performed ( $p < 0.05$ ).

### Supplementary Table 2

| <b>Genotype</b> | <b><i>Barx2</i><sup>+/+</sup></b> | <b><i>Barx2</i><sup>+/-</sup></b> | <b><i>Barx2</i><sup>-/-</sup></b> |
|-----------------|-----------------------------------|-----------------------------------|-----------------------------------|
| <b>Observed</b> | 21                                | 49                                | 15                                |
| <b>Expected</b> | 21.25                             | 42.5                              | 21.25                             |

**Supplementary Table 2. *Barx2*<sup>-/-</sup>:*mdx* pups are significantly underrepresented in litters derived from *Barx2*<sup>+/-</sup>:*mdx* crosses.** After 6 generations of inbreeding, we collected and genotyped 16 litters (85 offspring) from crosses between *Barx2*<sup>+/-</sup>:*mdx* mice i.e. heterozygous for *Barx2* and homozygous for the *mdx* allele of dystrophin. Mice were 4 weeks old when genotyped. The number of mice of each *Barx2* genotype observed was compared to the expected 1:2:1 ratio. *Barx2*<sup>-/-</sup>:*mdx* mice are significantly underrepresented (exact binomial test, p=0.07).
